# Supplementary material for: Responsivity improvement of a packaged ZnMgO solar blind ultraviolet photodetector via a sealing treatment of silica gel
Source: Royal Society of Chemistry journal article supplement (doi:10.1039/c9tc05427h), 2019-12-02
Supplement: c9tc05427h1.pdf [file c9tc05427h1.pdf]

## electronic supplementary information

# Packaging and responsivity improvement of ZnMgO solar blind ultraviolet photodetector by a seal treatment of silica gel

Xing Chen,<sup>a, b</sup> Liyan Wang,<sup>a, b</sup> Kewei Liu,<sup>\*a, b</sup> Zhenzhong Zhang,<sup>a, b</sup>  
Binghui Li,<sup>a, b</sup> Jiabin Wu,<sup>a, c</sup> Jingyuan Wang,<sup>a, c</sup> Yingxue Ni,<sup>a, c</sup> and  
Dezhen Shen<sup>\*a, b</sup>

<sup>a</sup>. State Key Laboratory of Luminescence and Applications, Changchun Institute of Optics, Fine Mechanics and Physics, Chinese Academy of Sciences, Changchun 130033, P. R. China.

<sup>b</sup>. Center of Materials Science and Optoelectronics Engineering, University of Chinese Academy of Sciences, Beijing 100049, P. R. China

<sup>c</sup>. Photoelectric Detection Research Department, Changchun Institute of Optics, Fine Mechanics and Physics, Chinese Academy of Sciences, Changchun 130033, P. R. China

### Corresponding Author

\*E-mail: liukw@ciomp.ac.cn

\*E-mail: shendz@ciomp.ac.cn

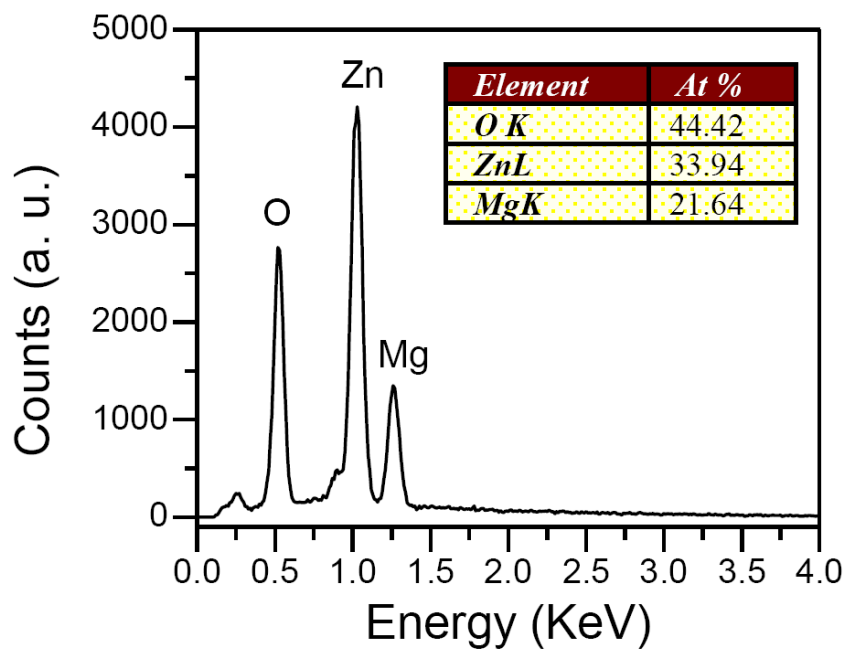

**Figure S1. EDS spectra of ZnMgO films.**

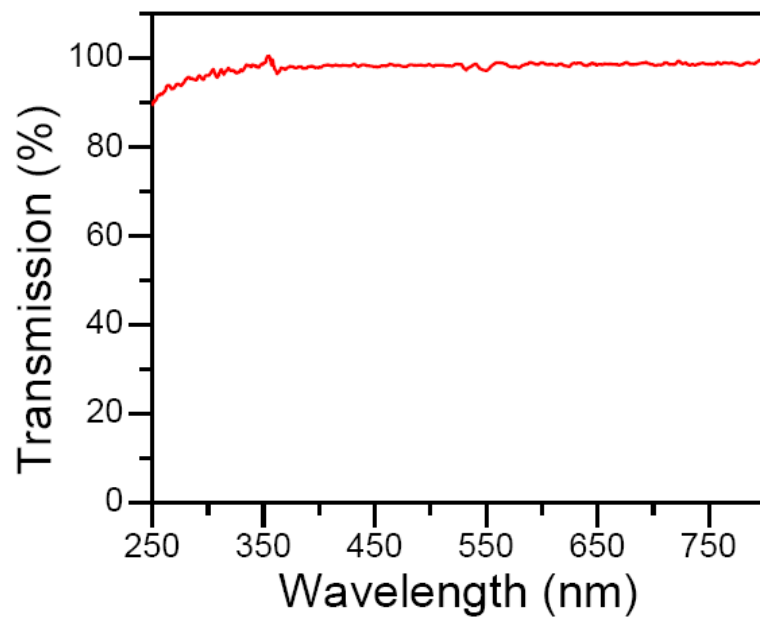

**Figure S2. UV-Vis transmission spectra of silica gel.**
